# Supplementary material for: The CCAAT-binding complex coordinates the oxidative stress response in eukaryotes
Source: PubMed Central journal article supplement — Nucleic Acids Res. 2009 Dec 3;38(4):1098–113. doi: 10.1093/nar/gkp1091 (PMC2831313; doi:10.1093/nar/gkp1091), 2009-12-03
Supplement: gkp1091_1.pdf [file gkp1091_1.pdf]

## Supplementary Data

### Supplementary experimental procedures

#### Preparation of the HapC-TNB mixed disulfides

One mg of the respective purified and lyophilized HapC(CSS), HapC(SCS) and HapC(SSC) proteins were dissolved in water and incubated with an excess of DTNB. The final reaction mixture contained 45  $\mu$ M of the respective HapC double serine mutant and 2 mM DTNB. The reaction was monitored at 412 nm for the completion of the reaction. The volume of the reaction mixture was then applied to a NAP-5 column (GE Healthcare) to remove the excess of DTNB and released TNB, and for transfer of the mixed disulfides HapC(CSS)-TNB, HapC(SCS)-TNB and HapC(SSC)-TNB into 0.1 M potassium phosphate buffer, 2 mM EDTA, pH 7.5. Then, aliquots of the mixed disulfides HapC-TNB were directly used in a reaction with TrxA(C39S), as described in the following section.

#### Preparation of the mixed disulfides between HapC(CSS), HapC(SCS), HapC(SSC) and TrxA(C39S)

First, TrxA(C39S) was treated with 100 mM DTT for 30 minutes at room temperature to make sure the remaining nucleophilic active-site thiol (Cys36) was in the reduced state. The excess of DTT was removed by the use of a NAP-5 column. Then, TrxA(C39S) was incubated with equimolar amounts of mixed disulfide HapC(CSS)-TNB, HapC(SCS)-TNB or HapC(SSC)-TNB in 0.1 M potassium phosphate buffer, 2 mM EDTA, pH 7.5 at room temperature. The reaction was monitored at 412 nm for the release of TNB. Upon completion of the reaction the formed product was analyzed on SDS-PAGE.

#### Subcellular localization of HapC-eGFP and HapC(SSS)-eGFP fusions

The *A. nidulans* strain  $\Delta$ C-HapCegfp was generated previously (1). A HapC-eGFP fusion in which all cysteines of HapC were exchanged to serines was created by site specific mutagenesis according to the method of Higuchi et al. (2) using the primer pairs HapC5'BamHI/3CS-Backward and HapC3'NcoI/3CS-Forward, and the plasmid pHapC-eGFP as template. A DNA fragment was amplified using the primers HapC5'BamHI and HapC3'NcoI. The resulting PCR fragment was cloned into the *Bam*HI-*Nco*I-digested plasmid p123 and fused to *egfp* under the control of the *otef* promoter. The resulting plasmid was named pHapC(SSS)-eGFP. To use the *pyr-4* gene of *Neurospora crassa* as a selectable

marker for the transformation of *A. nidulans*, the *otef(p)-hapC(SSS)-egfp-nos(t)* cassette, was excised from pHapC(SSS)-eGFP by *ClaI-KpnI* digestion and cloned into the plasmid pKTB1 resulting in the plasmid pKTB1-HapC(SSS)-eGFP. To employ the *A. nidulans pyroA* gene as a selection marker for the transformation of *A. nidulans*, the *pyroA* gene was amplified by PCR using the primers AnPyro-For and AnPyro-Rev and genomic DNA of the AXB4A2 strain as a template. The PCR product was digested with *HindIII* and ligated into the plasmid pHapC-eGFP resulting in the plasmid pHapC-eGFP-pyro. Transformation of the *A. nidulans*  $\Delta hapC$  strain Nat24 and the  $\Delta trxA$  strain AnTrxAKO with the plasmids pKTB1-HapC(SSS)-eGFP and pHapC-eGFP-pyro resulted in the strains  $\Delta C$ -HapCegfp-SSS and  $\Delta trxA$ -HapCegfp, respectively.

### **Generation of plasmids and strains for BiFC analysis**

To study the interaction between HapC and HapE, the *hapC* gene was PCR amplified, using primers HapC-BiFC-For and HapC-BiFC-Rev to introduce flanking *NcoI* sites. After *NcoI* digestion, the DNA fragment was ligated into the plasmid pEYFPC to yield plasmid pHapC-YC. For employing the *pyr-4* gene of *N. crassa* as a selection marker, the DNA fragment encoding *gpdA(p)-hapC-eyfpC-trpC(t)* was reisolated from plasmid pHapC-YC and cloned into plasmid pKTB1 using *XbaI*. The resulting plasmid was designated pHapC-YC-pyr4. The HapE open reading frame was cloned directly by digesting pHapE-eGFP with *NcoI* and ligated into pEYFPN generating the plasmid pHapE-YN. The recipient strain AXB4A2 was co-transformed with plasmids pHapC-YC-pyr4 and pHapE-YN resulting in the strain yHapC-HapE.

To use pEYFPN as a control for the HapC/HapE interaction experiment, the *gpdA(p)-eyfpN-trpC(t)* cassette was amplified by PCR using the primers EYFP5'EcoRI(C2) and EYFP3'EcoRI(C2) from plasmid pEYFPN as a template. The PCR product was digested with *EcoRI* and ligated into *EcoRI*-digested pKTB1. The generated plasmid was designated pYN-pyr4. Transformation of strain AXB4A2 with the plasmid pYN-pyr4 resulted in the strain yN. To use pEYFPC as a control, the *gpdA(p)-eyfpC-trpC(t)* fragment was excised from plasmid pEYFPC using *XbaI* and cloned into pKTB1. The generated plasmid was designated pYC-pyr4. The plasmid was transformed in the *A. nidulans* strain AXB4A2 resulting in strain yC. The strain yCN was generated by co-transforming strain AXB4A2 with pYC-pyr4 and pEYFPN. The yHapE-C and yHapC-N strains were generated by co-transforming strain AXB4A2 with the plasmid pairs pHapE-YN and pYC-pyr4, and pHapC-YC-pyr4 and pEYFPN, respectively.

To analyse the interaction between HapC and TrxA in the *A. nidulans* wild-type strain AXB4A2, HapC-YC and TrxA-YN fusions were employed. Generation of a plasmid, which contains a HapC-YC fusion, was described above. The plasmid encoding the TrxA-YN fusion was constructed as follows: the *trxA* gene was amplified by PCR using primers TrxNcoI for and TrxNcoI rev and plasmid pET39-AnTrxA(wt)-H6 as a template. The PCR product was digested with *NcoI* and ligated into the *NcoI*-digested pEYFPN. The resulting plasmid was designated pTrxA-YN. Co-transformation of plasmids pHapC-YC-pyr4 and pTrxA-YN into strain AXB4A2 yielded strain yHapC-TrxA. Two control strains were used, yHapC-N and strain yTrxA-C, which was generated by co-transforming strain AXB4A2 with plasmids pTrxA-YN and pYC-pyr4.

Visualization of the interaction between HapC and TrxA in the  $\Delta hapE$  strain  $\Delta E-89$  was achieved by using HapC-YC and TrxA-YN fusions as described previously. To employ the *pabaA1* gene as a selection marker for the transformation of *A. nidulans*, the *gpdA(p)-hapC-eyfpC-trpC(t)* cassette was amplified by PCR using primers EYFP5'BamHI and EYFP3'BamHI and plasmid pHapC-YC-pyr4 as a template. The PCR product was digested with *BamHI* and ligated into plasmid pabaAnid resulting in plasmid pHapC-YC-paba. To employ the *pyr-4* gene of *N. crassa* as a selection marker, the *gpdA(p)-trxA-eyfpN-trpC(t)* DNA fragment was amplified by PCR using primers EYFP5'KpnI and EYFP3'KpnI and plasmid pTrxA-YN as a template. The PCR product was digested with *Acc65I* (an isoschizomer of *KpnI*) and ligated into *Acc65I*-digested pKTB1. The resulting plasmid was designated pTrxA-YN-pyr4. Co-transformation of the  $\Delta E-89$  strain with plasmids pHapC-YC-paba and pTrxA-YN-pyr4 resulted in the strain yHapC-TrxA- $\Delta E$ .

## Supplementary Figures

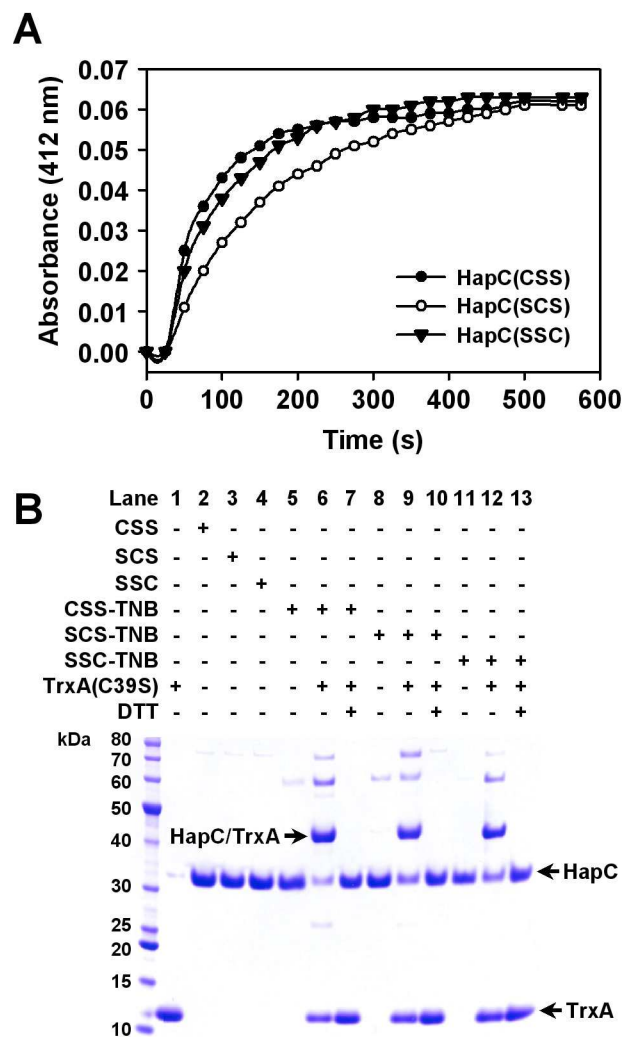

**Figure S1.** HapC single cysteine mutants CSS, SCS and SSC form stable mixed disulfides with a TrxA(C39S) mutant. Emergence of disulfide linked HapC-TrxA(C39S) heterodimers from HapC-TNB adducts and TrxA(C39S) was monitored at 412 nm by the release of TNB (A) and by SDS-PAGE analysis (B).

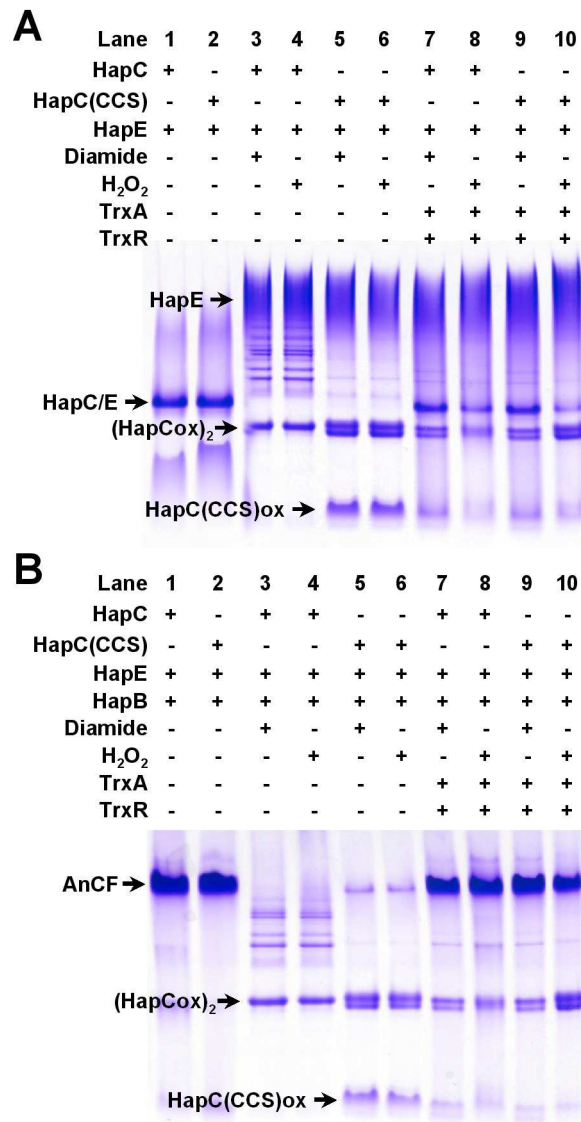

**Figure S2.** Disruption of the HapC/HapE heterodimer or the AnCF complex by oxidation and the recycling by the *A. nidulans* thioredoxin system *in vitro*. Native PAGE analysis of an oxidation/reduction cycle of HapC/HapE heterodimers (**A**) or the AnCF (**B**) composed of either HapC or HapC(CCS) using diamide or H<sub>2</sub>O<sub>2</sub> for oxidation, respectively. Preformed HapC/HapE and AnCF samples (Lanes 1 and 2) contained 10  $\mu$ M of each Hap subunit.

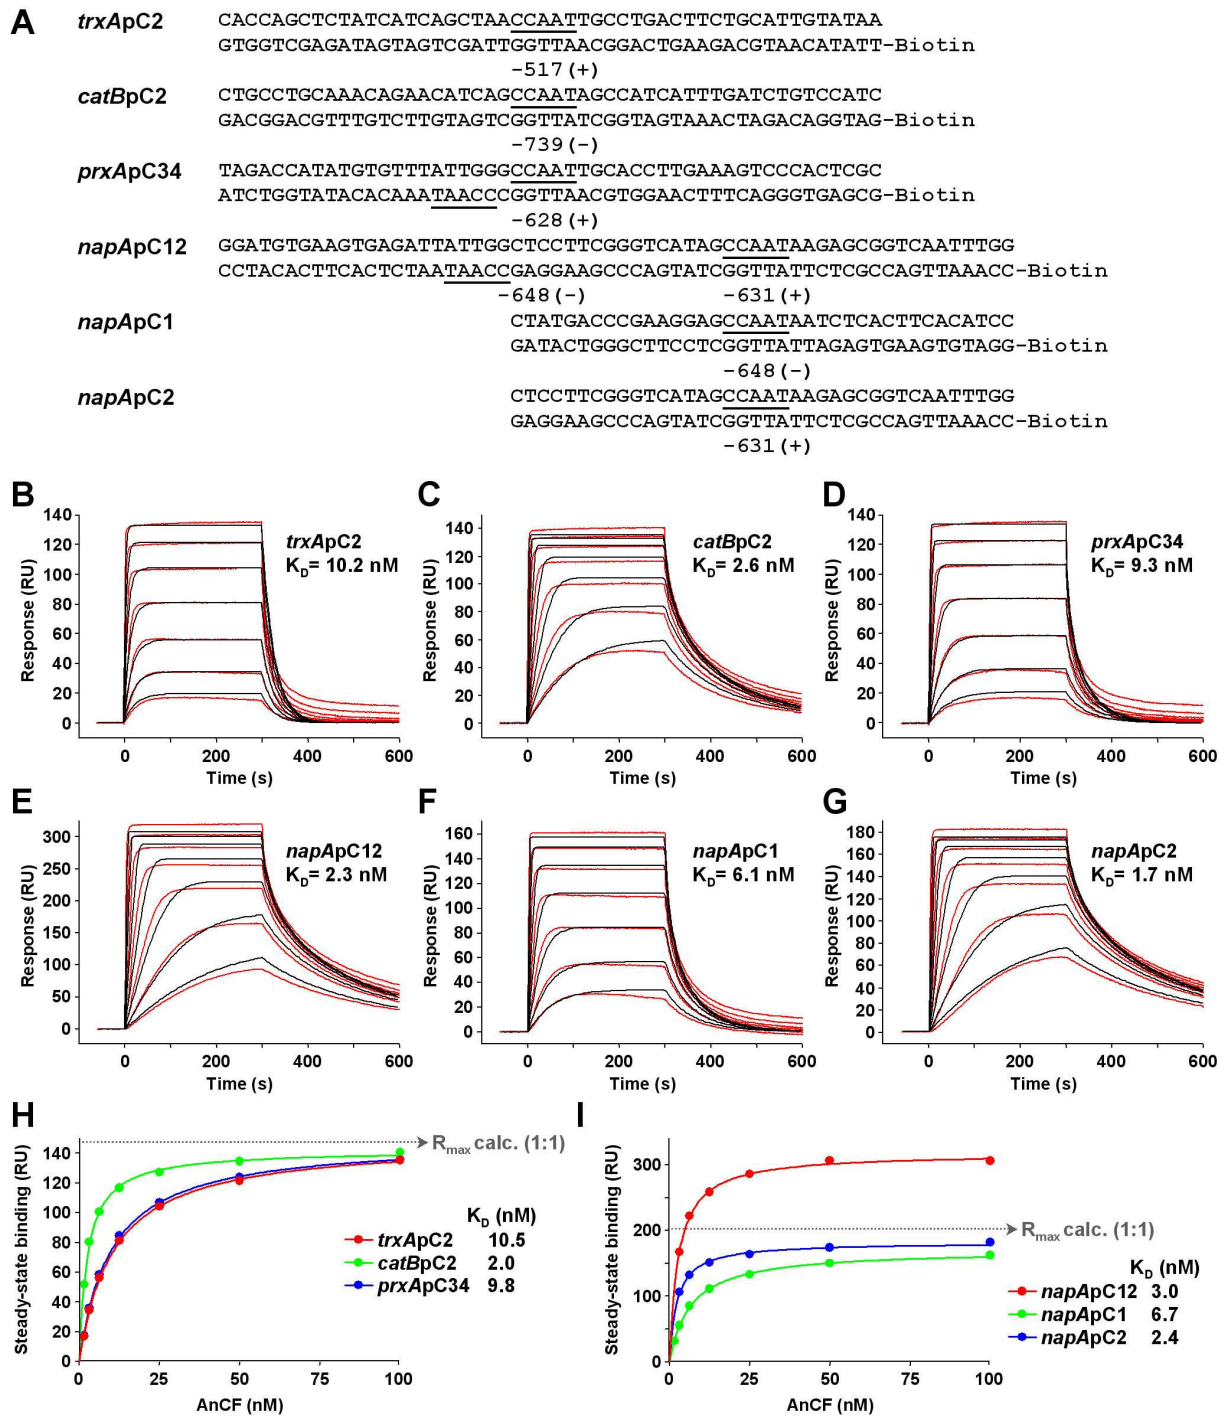

**Figure S3.** Real-time *in vitro* binding of AnCF to DNA encoding CCAAT boxes of the promoter regions of *A. nidulans* *trxA*, *catB*, *prxA* and *napA*. (A) Sequences of the duplexes used as DNA probes in SPR analyses. Positions of the CCAAT boxes (underlined) with respect to the start codon are indicated. (B-G) Responses of 100, 50, 25, 12.5, 6.25, 3.13 and 1.56 nM AnCF binding (red lines) to DNA duplexes are shown overlaid with the fit derived from a 1:1 interaction model (black lines). (H, I) Fit of the equilibrium data for DNA binding of AnCF. The calculated maximum binding capacities for a 1:1 interaction of AnCF with the immobilized DNA duplexes are marked by dotted arrows.

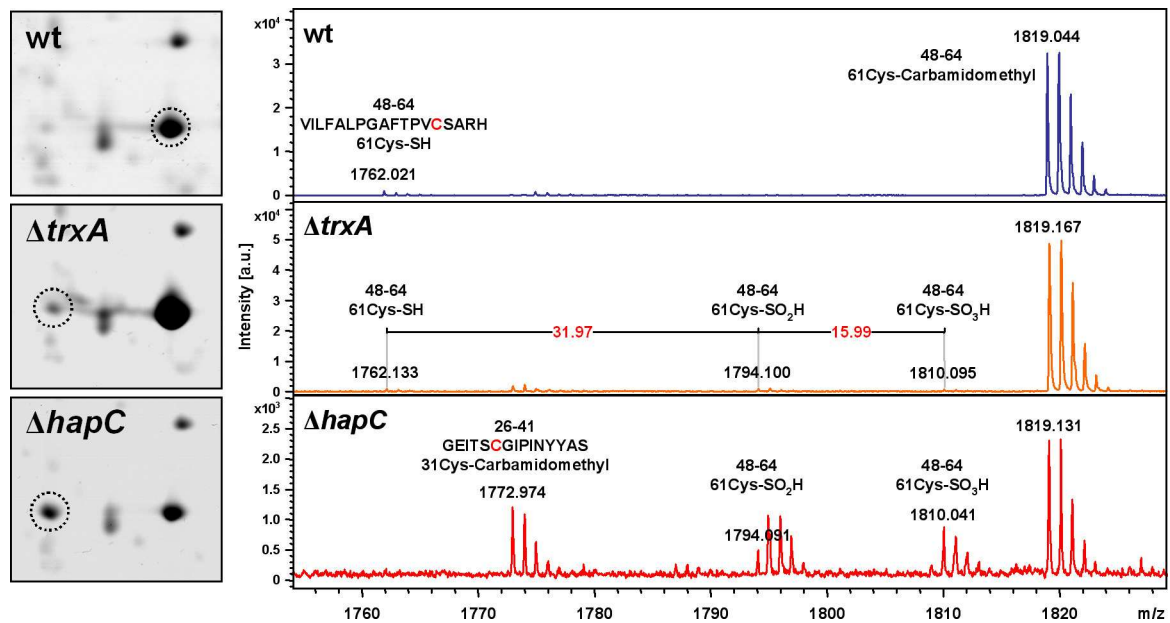

**Figure S4.** Peroxiredoxin A is hyperoxidized in an *A. nidulans*  $\Delta hapC$  strain. The spots corresponding to normal and oxidized PrxA were collected from 2-D gels as indicated by dotted circles (left panel) and analyzed by MALDI MS (right panel). The oxidized spot, picked from a 2-D gel that was loaded with protein extracts from  $\Delta hapC$  mycelia, contains both the sulfinic and sulfonic acid forms of peptide 48-64 from PrxA.

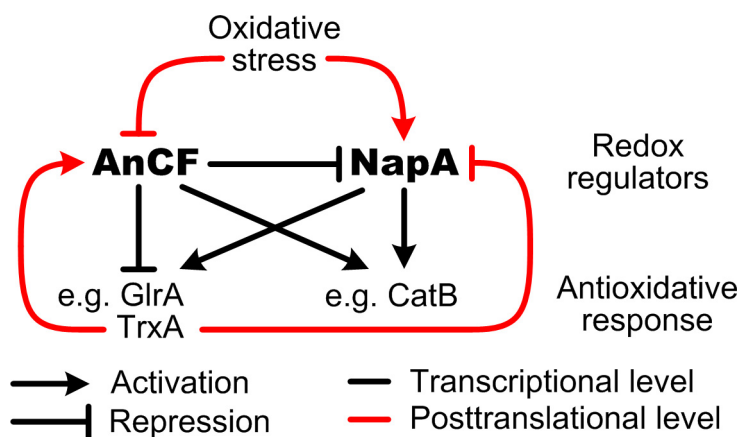

**Figure S5.** Mechanism for adaptation to oxidative stress situation in *A. nidulans*. The two redox-regulated regulators AnCF and NapA are controlled by interconnected feedback loops. Oxidative stress activates NapA causing nuclear accumulation and inactivates AnCF leading to cytoplasmic retention. The resulting oxidative stress response triggered by NapA activation and AnCF inactivation includes activation of the thioredoxin system, which inactivates NapA and reactivates AnCF. Moreover, AnCF most likely directly transcriptionally represses *napA* and also some NapA target genes, whereas NapA controls AnCF activity indirectly via the cellular redox state. It remains to be elucidated why AnCF affects some genes involved in antioxidative response inversely, e.g., *glrA* and *catB*.



## Supplementary Tables

**Table S1. Plasmids used in this study**

| Plasmids             | Genotype                                                                                                                                   | Reference   |
|----------------------|--------------------------------------------------------------------------------------------------------------------------------------------|-------------|
| p123                 | Amp <sup>R</sup> ; <i>egfp</i>                                                                                                             | (3)         |
| pabaAnid             | Amp <sup>R</sup> ; pUC 18, 4.1 kb <i>KpnI</i> fragment containing <i>pabaA1</i> and the flanking regions derived from <i>A. nidulans</i> . | (4)         |
| pET39-AnTrxA(wt)-H6  | Kan <sup>R</sup> ; T7 promoter - <i>trxA</i> - His <sub>6</sub>                                                                            | (5)         |
| pET39H6-AnTrxR       | Kan <sup>R</sup> ; T7 promoter-His <sub>6</sub> - <i>trxR</i>                                                                              | (5)         |
| pET43.1H6NapA        | Amp <sup>R</sup> ; T7 promoter-His <sub>6</sub> - <i>napA</i>                                                                              | unpublished |
| pET43.1H6GpxA        | Amp <sup>R</sup> ; T7 promoter-His <sub>6</sub> - <i>gpxA</i>                                                                              | unpublished |
| pEYFPC               | Amp <sup>R</sup> ; Hyg <sup>R</sup> ; <i>eyfpC</i> terminal part                                                                           | (6)         |
| pEYFPN               | Amp <sup>R</sup> ; Hyg <sup>R</sup> ; <i>eyfpN</i> terminal part                                                                           | (6)         |
| pHapC(SSS)-eGFP      | Amp <sup>R</sup> ; <i>hapC(SSS)-egfp</i>                                                                                                   | This study  |
| pHapC-eGFP           | Amp <sup>R</sup> ; <i>hapC-egfp</i>                                                                                                        | (1)         |
| pHapC-eGFP-pyro      | Amp <sup>R</sup> ; <i>hapC-egfp</i> ; <i>pyroA</i>                                                                                         | This study  |
| pHapC-YC             | Amp <sup>R</sup> ; Hyg <sup>R</sup> ; <i>hapC-eyfpC</i>                                                                                    | This study  |
| pHapC-YC-paba        | Amp <sup>R</sup> ; <i>pabaA1</i> ; <i>hapC-eyfpC</i>                                                                                       | This study  |
| pHapC-YC-pyr4        | Amp <sup>R</sup> ; <i>pyr-4</i> ; <i>hapC-eyfpC</i>                                                                                        | This study  |
| pHapE-eGFP           | Amp <sup>R</sup> ; <i>hapE-egfp</i>                                                                                                        | (1)         |
| pHapE-YN             | Amp <sup>R</sup> ; Hyg <sup>R</sup> ; <i>hapE-eyfpN</i>                                                                                    | This study  |
| pKTB1                | Amp <sup>R</sup> ; <i>pyr-4</i>                                                                                                            | (7)         |
| pKTB1-HapC(SSS)-eGFP | Amp <sup>R</sup> ; <i>pyr-4</i> ; <i>hapC(SSS)-egfp</i>                                                                                    | This study  |
| pKTB1-HapC-eGFP      | Amp <sup>R</sup> ; <i>pyr-4</i> ; <i>hapC-egfp</i>                                                                                         | This study  |
| pTrxA-YN             | Amp <sup>R</sup> ; Hyg <sup>R</sup> ; <i>trxA-eyfpN</i>                                                                                    | This study  |
| pTrxA-YN-pyr4        | Amp <sup>R</sup> ; <i>pyr-4</i> ; <i>trxA-eyfpN</i>                                                                                        | This study  |
| pYC-pyr4             | Amp <sup>R</sup> ; <i>pyr-4</i> ; <i>eyfpC</i> terminal part                                                                               | This study  |
| pYN-pyr4             | Amp <sup>R</sup> ; <i>pyr-4</i> ; <i>eyfpN</i> terminal part                                                                               | This study  |

**Table S2. Oligonucleotides used in this study****A) BiFC analysis and amplification of hybridization probes**

| Oligonucleotide          | Sequence (5'→3')                                                              |
|--------------------------|-------------------------------------------------------------------------------|
| 3CS-Backward             | AGATTTTTTCGGAAGCCTCGCTAGTAATAAAAGAGATGAATTCGCTCACAG<br>ATTCTTGCATAGATTCTTT AG |
| 3CS-Forward              | TCTATGCAAGAATCTGTGAGCGAATTCATCTCTTTTATTACTAGCGAGGCT<br>TCCGAAAAATCTCAACAGGA   |
| AnPyro-For               | GAGCAGCTGAAGCTTTGCGCGAAAGCGTAAGGAGA                                           |
| AnPyro-Rev               | GAGCAGCTGAAGCTTTCGCAATCTGACTTGACGC                                            |
| EYFP3'EcoRI(C2)          | GGCCGAATTCCTTACCTCTAAACAAGTGTACCTGTGCATT                                      |
| EYFP5'EcoRI(C2)          | TATAGAATTCGTACAGTGACCGGTGACTCTTTCTGGC                                         |
| EYFP3'BamHI              | GTACACGAGGACTGGATCCAAGAAGGATTACCTCTAAACAA                                     |
| EYFP5'BamHI              | TTGGGCGAGCTCGGATCCGTGACCGGTGACTCTTT                                           |
| EYFP3'KpnI               | GGCCGGTACCTTACCTCTAAACAAGTGTACCTGTGCATT                                       |
| EYFP5'KpnI               | TATAGGTACCGTACAGTGACCGGTGACTCTTTCTGGC                                         |
| HapC3'NcoI               | CAGAAAGCCATGGAAGATTCGCCACCAGC                                                 |
| HapC5'BamHI              | CCAACAGCTGGATCCATGTGTCGTCGACC                                                 |
| HapC-BiFC-For            | CCAACAGCTCCATGGCAATGTGTCGTCGACC                                               |
| HapC-BiFC-Rev            | AACCATGGGAGGGTATCCATAAGCTGAGGC                                                |
| TrxNcoI for              | GGCGGATCCATGGGTGCCTCTGAACACG                                                  |
| TrxNcoI rev              | GATCCCCATGGAAGCAAGCAGAGCCTTG                                                  |
| AnYap1 for <sup>1</sup>  | ATGGCCGACTACAATCTTTGTACCAACAC                                                 |
| AnYap1 rev <sup>1</sup>  | CTACACGCGGCCAATGATGTCATCCACA                                                  |
| AnTrxA for <sup>1</sup>  | ATGGGTGCCTCTGAACACGC                                                          |
| AnTxA rev <sup>1</sup>   | CTAAGCAAGCAGAGCCTTGA                                                          |
| AnTrxR for <sup>1</sup>  | ATGGTTCACTCCAAAGTAGTTATCATC                                                   |
| AnTrxR rev <sup>1</sup>  | TTACAGAGCGGGGTTAGCGTGAGCAG                                                    |
| AnCatB for <sup>2</sup>  | ATGGTGGCCCGAACTTTGAGCAG                                                       |
| AnCatB rev <sup>2</sup>  | TCCAGGGCAAAGCGATCCAAGAAC                                                      |
| AnGlrA for <sup>2</sup>  | GTCCCCAAGAAGATGACCTGGAACCTC                                                   |
| AnGlrA rev <sup>2</sup>  | GTTAGCTCGGCCTGACCTGTGACA                                                      |
| AnGpxA for <sup>1</sup>  | ATGCCGTTACATATTGTGGCTTAGTTCCA                                                 |
| An GpxA rev <sup>1</sup> | TTACGCCAGCTTGGCAGTCTCCCCGTC                                                   |
| AnPrxA for <sup>2</sup>  | GTCGTCGTTCTTAACACCGTTGG                                                       |
| AnPrxA rev <sup>2</sup>  | ACATTCCTGGACTGAGGAGAAG                                                        |

<sup>1</sup> These probe-generating primers were used for amplification of cDNA encoded by the respective plasmids pET39-AnTrxA(wt)-H6, pET39H6-AnTrxR, pET43.1H6NapA and pET43.1H6GpxA.

<sup>2</sup> These primers were used for generation of northern hybridization probes based on the amplification of the largest exon of the respective gene.

## B) SPR analysis

| Gene        | Oligo-nucleotide                     | Sequence <sup>1</sup> (5'→3')                                                                                                                                                         |
|-------------|--------------------------------------|---------------------------------------------------------------------------------------------------------------------------------------------------------------------------------------|
| <i>sreA</i> | SREACB1<br>B-SREACB1i                | CGCCCACCGAGTCTCGCTGCAG <u>CCAAT</u> CACAGCAAGCGTGATGACACTAC<br>Biotin-<br>TGACGAATCAGGTGGCGCGGATTATCATTGGTCAACCCGGTCTTCAAGAC                                                          |
| <i>trxA</i> | <i>trxAC2</i><br>B- <i>trxAC2i</i>   | CACCAGCTCTATCATCAGCTAAC <u>CCAAT</u> TGCCTGACTTCTGCATTGTATAA<br>Biotin-<br>TTATACAATGCAGAAGTCAGGCAATTGGTTAGCTGATGATAGAGCTGGTG                                                         |
| <i>catB</i> | <i>catBC2</i><br>B- <i>catBC2i</i>   | CTGCCTGCAAACAGAACATCAG <u>CCAAT</u> AGCCATCATTGATCTGTCCATC<br>Biotin-<br>GATGGACAGATCAAATGATGGCTATTGGCTGATGTTCTGTTTGCAGGCAG                                                           |
| <i>prxA</i> | <i>prxAC34</i><br>B- <i>prxAC34i</i> | TAGACCATATGTGTTT <u>ATTGGG</u> <u>CCAAT</u> TGCACCTTGAAAGTCCCACTCGC<br>Biotin-<br>GCGAGTGGGACTTTCAAGGTGCAATTGGCCAATAAACACATATGGTCTA                                                   |
| <i>napA</i> | <i>napAC12</i><br>B- <i>napAC12i</i> | GGATGTGAAGTGAGATT <u>ATTGG</u> CTCCTTCGGGTCATAG <u>CCAATA</u> AAGAGCG<br>GTCAATTTGG<br>Biotin-<br>CCAAATTGACCGCTCTT <u>ATTGG</u> CTATGACCCGAAGGAG <u>CCAATA</u> AATCTCAC<br>TTCACATCC |
| <i>napA</i> | <i>napAC1</i><br>B- <i>napAC1i</i>   | CTATGACCCGAAGGAG <u>CCAATA</u> AATCTCACTTCACATCC<br>Biotin-GGATGTGAAGTGAGATT <u>ATTGG</u> CTCCTTCGGGTCATAG                                                                            |
| <i>napA</i> | <i>napAC2</i><br>B- <i>napAC2i</i>   | CTCCTTCGGGTCATAG <u>CCAATA</u> AAGAGCGGTCAATTTGG<br>Biotin-CCAAATTGACCGCTCTT <u>ATTGG</u> CTATGACCCGAAGGAG                                                                            |

<sup>1</sup> CCAAT boxes are underlined

**Table S3. Comparison of the proteome of the *A. nidulans* wild type and  $\Delta hapC$** **A) Proteins with higher levels in  $\Delta hapC$  versus wild type**

| Putative function                                                                          | Gene ID   | pI/MW     | Fold changes | Sequence coverage (%) | Mascot score |
|--------------------------------------------------------------------------------------------|-----------|-----------|--------------|-----------------------|--------------|
| Elongation factor 3                                                                        | AN6700.4  | 6.2/102.2 | 2.8          | 36.2                  | 231.0        |
| pH response regulator PalA                                                                 | AN4351.4  | 7.2/94.8  | 2.8          | 8.6                   | 56.1         |
| Eukaryotic translation initiation factor subunit eIF2A                                     | AN2775.4  | 9.6/73.5  | 2.4          | 41.1                  | 173.0        |
| ATP citrate lyase, subunit 1                                                               | AN2436.4  | 8.2/71.6  | 2.4          | 66.0                  | 275.0        |
| Choline oxidase (CodA)                                                                     | AN1429.4  | 6.7/60.0  | 4.3          | 47.6                  | 192.0        |
| Translation initiation factor 4B                                                           | AN7350.4  | 9.6/53.6  | 3.4          | 28.8                  | 104.0        |
| T-complex protein 1, eta subunit                                                           | AN5713.4  | 6.4/60.8  | 4.9          | 39.4                  | 115.0        |
| Nuclear segregation protein (Bfr1)                                                         | AN0753.4  | 9.9/54.3  | 2.3          | 21.3                  | 64.9         |
| ATP synthase alpha chain, mitochondrial precursor <sup>2</sup>                             | AN1523.4  | 9.6/60.1  | 2.1          | 36.5                  | 122.0        |
| ThiF domain protein, putative                                                              | AN4714.4  | 7.6/57.3  | 2.1          | 37.9                  | 126.0        |
| GDP-mannose pyrophosphorylase A                                                            | AN1911.4  | 7.2/48.5  | 2.1          | 18.2                  | 56.9         |
| hypothetical oxidoreductase                                                                | AN2682.4  | 5.9/46.1  | 2.4          | 32.0                  | 106.0        |
| Hydroxymethylglutaryl-CoA synthase                                                         | AN4923.4  | 6.2/50.8  | 2.6          | 37.0                  | 93.4         |
| Ornithine aminotransferase                                                                 | AN1810.4  | 5.9/49.2  | 2.2          | 55.9                  | 192.0        |
| hypothetical protein similar to elongation factor EF-Tu                                    | AN1084.4  | 6.9/48.3  | 2.1          | 41.2                  | 113.0        |
| C-3 sterol dehydrogenase/C-4 decarboxylase                                                 | AN7575.4  | 7.1/45.5  | 2.5          | 43.2                  | 117.0        |
| 60S ribosome biogenesis protein Brx1                                                       | AN10055.4 | 9.7/40.4  | 2.1          | 19.8                  | 54.4         |
| conserved expressed oxidoreductase <sup>1</sup>                                            | AN2208.4  | 7.1/40.1  | 2.2          | 59.4                  | 134.0        |
| Glutathione S-transferase <sup>1</sup>                                                     | AN10273.4 | 7.8/40.1  | 2.1          | 45.6                  | 153.0        |
| CCCH finger DNA binding protein, putative                                                  | AN6922.4  | 9.4/39.0  | 6.3          | 27.6                  | 70.8         |
| conserved hypothetical protein                                                             | AN6891.4  | 10.4/41.5 | 2.2          | 45.1                  | 132.0        |
| DnaJ domain protein Psi                                                                    | AN2238.4  | 9.9/40.2  | 4.4          | 24.9                  | 64.4         |
| Tryptophanyl-tRNA synthetase, putative                                                     | AN6488.4  | 9.8/42.7  | 3.4          | 36.5                  | 117.0        |
| translational initiation factor 2 beta                                                     | AN2992.4  | 9.3/33.8  | 3.5          | 40.5                  | 79.1         |
| hypothetical protein similar to 60S ribosomal protein L5                                   | AN1013.4  | 9.1/34.4  | 2.5          | 50.5                  | 103.0        |
| Pyridoxine biosynthesis protein PyroA, involved in response to singlet oxygen <sup>1</sup> | AN7725.4  | 6.3/32.3  | 3.2          | 41.1                  | 96.6         |
| Proteasome component Pre8 <sup>2</sup>                                                     | AN6726.4  | 5.5/30.1  | 3.8          | 21.6                  | 51.8         |
| Proteasome component Pre6, putative                                                        | AN8054.4  | 8.6/27.0  | 4.2          | 35.4                  | 51.9         |
| Proteasome core alpha 1 component                                                          | AN4869.4  | 6.7/27.8  | 2.5          | 35.8                  | 91.4         |
| hypothetical protein similar to NADP-dependent mannitol dehydrogenase                      | AN7590.4  | 6.8/28.3  | 2.7          | 47.4                  | 82.3         |
| Formyltetrahydrofolate deformylase, putative                                               | AN0495.4  | 7.3/31.8  | 2.0          | 67.1                  | 154.0        |
| conserved hypothetical protein                                                             | AN7208.4  | 6.5/20.4  | 2.1          | 63.8                  | 83.1         |
| Peroxiredoxin/Prx5-like /allergen Asp F3                                                   | AN8692.3  | 5.6/18.5  | 0.75         | 32.7                  | 50.1         |
| Peroxiredoxin/Prx5-like /allergen Asp F3 (Sulfinic/Sulfonic acid)                          | AN8692.3  | 5.6/18.5  | 3.2          | 67.9                  | 99.0         |
| Peroxiredoxin/Prx5-like /allergen Asp F3 (total) <sup>1,2</sup>                            | AN8692.3  | 5.6/18.5  | 0.98         | -                     | -            |
| hypothetical protein similar to NADH-ubiquinone oxidoreductase                             | AN1063.4  | 8.2/18.2  | 2.0          | 53.5                  | 68.9         |
| Thioredoxin <sup>1</sup>                                                                   | AN0170.4  | 9.8/20.2  | 1.4          | 37.0                  | 48.6         |

<sup>1</sup> Proteins involved in oxidative stress response<sup>2</sup> Production of these proteins is also impaired in a  $\Delta glrA$  strain (8)

## B) Proteins with lower levels in *ΔhapC* versus wild type

| Putative function                                                                                        | Gene ID   | pI/MW    | Fold changes | Sequence coverage (%) | Mascot score |
|----------------------------------------------------------------------------------------------------------|-----------|----------|--------------|-----------------------|--------------|
| Cdc48 involved in response to stress                                                                     | AN7254.4  | 4.7/89.4 | 0.21         | 26.2                  | 156.0        |
| Phosphoglucomutase                                                                                       | AN2867.4  | 6.0/60.7 | 0.35         | 37.2                  | 151.0        |
| UDP-N-acetylglucosamine pyrophosphorylase <sup>2</sup>                                                   | AN9094.4  | 6.4/55.8 | 0.49         | 33.7                  | 124.0        |
| Elongation factor 2                                                                                      | AN6330.4  | 6.6/93.7 | 0.14         | 8.4                   | 47.5         |
| Tubulin alpha chain ( <i>tubB</i> )                                                                      | AN7570.4  | 4.7/50.0 | 0.21         | 30.2                  | 91.7         |
| Aminotransferase, classes I and II, putative                                                             | AN5591.4  | 6.0/53.7 | 0.39         | 29.7                  | 96.0         |
| 4-aminobutyrate aminotransferase                                                                         | AN2248.4  | 9.3/55.5 | 0.46         | 23.3                  | 69.7         |
| NADP-specific glutamate dehydrogenase                                                                    | AN4376.4  | 6.4/49.6 | 0.24         | 65.6                  | 202.0        |
| Peptidyl-prolyl cis-trans isomerase (orthologue of <i>S. pombe</i> Wis2, involved in response to stress) | AN4583.4  | 5.5/41.1 | 0.32         | 30.4                  | 96.4         |
| Glutamine synthetase                                                                                     | AN4159.4  | 5.8/39.7 | 0.39         | 31.7                  | 103.0        |
| Elongation factor 1-alpha                                                                                | AN4218.4  | 9.7/50.5 | 0.45         | 27.6                  | 86.0         |
| S-adenosylmethionine synthetase <sup>2</sup>                                                             | AN1222.4  | 5.2/42.2 | 0.12         | 21.4                  | 66.7         |
| hypothetical oxidoreductase <sup>1</sup>                                                                 | AN8815.4  | 5.5/40.5 | 0.12         | 53.2                  | 118.0        |
| Oxidoreductase, 2-nitropropane dioxygenase family                                                        | AN6031.4  | 7.7/37.6 | 0.49         | 49.9                  | 105.0        |
| Alcohol dehydrogenase I ( <i>alcA</i> ) <sup>2</sup>                                                     | AN8979.4  | 7.8/37.1 | 0.03         | 37.7                  | 79.1         |
| Thiamine biosynthesis protein                                                                            | AN8009.4  | 5.8/38.2 | 0.41         | 34.6                  | 71.3         |
| Thiazole synthase ( <i>thiF</i> )                                                                        | AN3928.4  | 5.4/35.6 | 0.13         | 28.4                  | 71.6         |
| Inorganic pyrophosphatase                                                                                | AN2968.4  | 5.0/32.4 | 0.08         | 38.3                  | 97.0         |
| Spermidine synthase, putrescine aminopropyltransferase                                                   | AN0687.4  | 5.1/33.3 | 0.46         | 40.8                  | 120.0        |
| NADH-ubiquinone oxidoreductase 24 kDa subunit, mitochondrial                                             | AN6077.4  | 6.2/30.0 | 0.48         | 33.7                  | 70.6         |
| putative 1-Cys peroxiredoxin <sup>1,2</sup>                                                              | AN10223.4 | 5.3/23.3 | 0.17         | 27.2                  | 65.8         |
| outer mitochondrial membrane protein porin <sup>2</sup>                                                  | AN4402.4  | 9.5/29.9 | 0.45         | 39.1                  | 73.5         |
| Woronin body major protein <sup>2</sup>                                                                  | AN4695.4  | 7.6/19.7 | 0.50         | 47.5                  | 64.7         |
| Nitroreductase family protein, putative                                                                  | AN2343.4  | 5.3/24.5 | 0.11         | 29.3                  | 68.7         |
| hypothetical PH domain protein <sup>2</sup>                                                              | AN3674.4  | 4.5/58.2 | 0.24         | 18.7                  | 83.2         |
| NADH-quinone oxidoreductase Pst2, putative                                                               | AN0297.4  | 6.2/22.0 | 0.49         | 53.9                  | 85.6         |
| Acireductone dioxygenase ARD family protein, putative                                                    | AN9527.4  | 5.0/20.9 | 0.03         | 59.6                  | 118.0        |
| allergen, putative AhpC/Tsa family protein <sup>1</sup>                                                  | AN8080.4  | 5.7/17.8 | 0.31         | 49.7                  | 71.7         |
| Co-chaperone, orthologue of <i>S. cerevisiae</i> AHA1 involved in response to stress                     | AN5602.4  | 5.0/36.6 | 0.13         | 26.9                  | 59.7         |
| DUF636 domain protein                                                                                    | AN7594.4  | 6.5/14.8 | 0.24         | 64.0                  | 75.5         |
| Methionine-R-sulfoxide reductase MsrB <sup>1</sup>                                                       | AN1932.4  | 6.7/16.6 | 0.55         | 45.8                  | 59.2         |
| Ubiquitin-conjugating enzyme                                                                             | AN8702.4  | 6.5/16.9 | 0.43         | 12.0                  | 27.5         |
| Conserved hypothetical protein                                                                           | AN5907.4  | 7.4/16.9 | 0.43         | 54.8                  | 85.0         |
| Calponin homology, EB1-like C-terminal motif                                                             | AN2862.4  | 4.7/27.1 | 0.15         | 26.0                  | 55.1         |
| RNA binding protein, putative                                                                            | AN5480.4  | 6.3/13.1 | 0.35         | 64.7                  | 90.5         |

<sup>1</sup> Proteins involved in oxidative stress response

<sup>2</sup> Production of these proteins is also impaired in a *ΔglrA* strain (8)

**Table S4. Comparison of the proteome of the *A. nidulans* wild type and  $\Delta$ *trxA***

| Putative function                                                                                         | Gene ID   | pI/MW     | Fold changes | Sequence coverage (%) | Mascot score |
|-----------------------------------------------------------------------------------------------------------|-----------|-----------|--------------|-----------------------|--------------|
| <b>Proteins with higher levels in <math>\Delta</math><i>trxA</i> versus wild type</b>                     |           |           |              |                       |              |
| Elongation factor 3*                                                                                      | AN6700.4  | 6.2/102.2 | 2.1          | 36.2                  | 231.0        |
| Phenylalanyl-tRNA synthetase, beta subunit                                                                | AN4086.4  | 5.3/67.7  | 2.2          | 23.8                  | 108.0        |
| Thioredoxin reductase                                                                                     | AN3581.4  | 5.0/36.1  | 5.5          | 67.8                  | 160.0        |
| DnaJ domain protein Psi*                                                                                  | AN2238.4  | 9.9/40.2  | 2.2          | 30.0                  | 73.8         |
| Tryptophanyl-tRNA synthetase, putative                                                                    | AN6488.4  | 9.8/42.7  | 2.5          | 36.5                  | 117.0        |
| Proteasome component Pre6, putative*                                                                      | AN8054.4  | 8.6/27.0  | 2.4          | 35.4                  | 51.9         |
| Peroxiredoxin/Prx5-like /allergen Asp F3                                                                  | AN8692.3  | 5.6/18.5  | 2.8          | 32.7                  | 50.1         |
| Peroxiredoxin/Prx5-like /allergen Asp F3 (Sulfinic/Sulfonic acid)                                         | AN8692.3  | 5.6/18.5  | 2.4          | 57.7                  | 91.9         |
| Peroxiredoxin/Prx5-like /allergen Asp F3 (total)*                                                         | AN8692.3  | 5.6/18.5  | 2.8          | -                     | -            |
| <b>Proteins with lower levels in <math>\Delta</math><i>trxA</i> versus wild type</b>                      |           |           |              |                       |              |
| Heat shock protein                                                                                        | AN10202.4 | 5.3/42.7  | 0.38         | 50.3                  | 132.0        |
| Heat shock 70 kDa protein                                                                                 | AN11227.4 | 5.4/40.8  | 0.35         | 57.3                  | 151.0        |
| Mannitol dehydrogenase, putative                                                                          | AN2815.4  | 6.6/56.6  | 0.49         | 31.5                  | 116.0        |
| Elongation factor 2*                                                                                      | AN6330.4  | 6.6/93.7  | 0.40         | 8.4                   | 47.5         |
| Tubulin alpha chain ( <i>tubB</i> )*                                                                      | AN7570.4  | 4.7/50.0  | 0.32         | 30.2                  | 91.7         |
| eukaryotic initiation factor 4A                                                                           | AN2932.4  | 4.8/44.9  | 0.28         | 53.3                  | 162.0        |
| Peptidyl-prolyl cis-trans isomerase (orthologue of <i>S. pombe</i> Wis2, involved in response to stress)* | AN4583.4  | 5.5/41.1  | 0.42         | 30.4                  | 96.4         |
| Aspartate transaminase                                                                                    | AN6048.4  | 7.2/48.8  | 0.42         | 62.0                  | 196.0        |
| Septin CDC11, putative                                                                                    | AN4667.4  | 4.7/43.1  | 0.30         | 31.9                  | 88.7         |
| Elongation factor 1-alpha*                                                                                | AN4218.4  | 9.7/50.5  | 0.32         | 27.6                  | 86.0         |
| S-adenosylmethionine synthetase*                                                                          | AN1222.4  | 5.2/42.2  | 0.35         | 60.8                  | 176.0        |
| Thioredoxin, putative                                                                                     | AN1639.4  | 4.7/36.3  | 0.28         | 26.7                  | 61.4         |
| Alcohol dehydrogenase I ( <i>alcA</i> )*                                                                  | AN8979.4  | 7.8/37.1  | 0.26         | 37.7                  | 79.1         |
| Translation initiation factor 3 subunit EifCj, putative                                                   | AN5745.4  | 4.6/29.4  | 0.45         | 34.0                  | 50.5         |
| Cofactor for methionyl- and glutamyl-tRNA synthetases, putative                                           | AN10474.4 | 7.1/ 46.5 | 0.28         | 25.6                  | 66.5         |
| Thiazole synthase ( <i>thiF</i> )*                                                                        | AN3928.4  | 5.4/35.6  | 0.29         | 41.7                  | 103.0        |
| Electron transfer flavoprotein alpha subunit, putative                                                    | AN6699.4  | 5.5/36.4  | 0.15         | 52.7                  | 142.0        |
| Inorganic pyrophosphatase*                                                                                | AN2968.4  | 5.0/32.4  | 0.18         | 38.3                  | 97.0         |
| Heat-shock protein                                                                                        | AN5781.4  | 5.2/23.4  | 0.17         | 45.9                  | 93.8         |
| NADH-ubiquinone oxidoreductase 24 kDa subunit, mitochondrial                                              | AN6077.4  | 6.2/30.0  | 0.41         | 33.7                  | 70.6         |
| 40S ribosomal protein S3Ae                                                                                | AN8870.4  | 10.8/29.1 | 0.27         | 25.4                  | 52.2         |
| hypothetical protein similar to NADP-dependent mannitol dehydrogenase                                     | AN7590.4  | 6.8/28.3  | 0.40         | 47.4                  | 100.0        |
| Cysteine dioxygenase Cdo1, putative                                                                       | AN4081.4  | 6.2/23.9  | 0.45         | 52.8                  | 94.4         |
| Cytochrome c subunit Vb, putative                                                                         | AN4525.4  | 6.2/22.0  | 0.43         | 43.3                  | 59.2         |
| ATP synthase D chain, mitochondrial                                                                       | AN6631.4  | 8.9/19.5  | 0.09         | 49.1                  | 84.3         |
| 40S ribosomal protein S19                                                                                 | AN4060.4  | 9.4/16.4  | 0.18         | 37.2                  | 61.1         |
| Methionine-R-sulfoxide reductase MsrB*                                                                    | AN1932.4  | 6.7/16.6  | 0.40         | 45.8                  | 59.2         |
| Chaperonin, putative                                                                                      | AN2432.4  | 9.1/11.2  | 0.45         | 52.4                  | 92.5         |

\* Proteins with higher and lower abundance in both  $\Delta$ *trxA* and  $\Delta$ *hapC* strains, respectively

## Supplementary references

1. Steidl, S., Tüncher, A., Goda, H., Guder, C., Papadopoulou, N., Kobayashi, T., Tsukagoshi, N., Kato, M. and Brakhage, A.A. (2004) A single subunit of a heterotrimeric CCAAT-binding complex carries a nuclear localization signal: piggy back transport of the pre-assembled complex to the nucleus. *J. Mol. Biol.*, **342**, 515-524.
2. Higuchi, R., Krummel, B. and Saiki, R.K. (1988) A general method of in vitro preparation and specific mutagenesis of DNA fragments: study of protein and DNA interactions. *Nucleic Acids Res.*, **16**, 7351-7367.
3. Spellig, T., Bottin, A. and Kahmann, R. (1996) Green fluorescent protein (GFP) as a new vital marker in the phytopathogenic fungus *Ustilago maydis*. *Mol. Gen. Genet.*, **252**, 503-509.
4. Tüncher, A., Spröte, P., Gehrke, A. and Brakhage, A.A. (2005) The CCAAT-binding complex of eukaryotes: evolution of a second NLS in the HapB subunit of the filamentous fungus *Aspergillus nidulans* despite functional conservation at the molecular level between yeast, *A.nidulans* and human. *J. Mol. Biol.*, **352**, 517-533.
5. Thön, M., Al-Abdallah, Q., Hortschansky, P. and Brakhage, A.A. (2007) The thioredoxin system of the filamentous fungus *Aspergillus nidulans*: impact on development and oxidative stress response. *J. Biol. Chem.*, **282**, 27259-27269.
6. Hoff, B. and Kück, U. (2005) Use of bimolecular fluorescence complementation to demonstrate transcription factor interaction in nuclei of living cells from the filamentous fungus *Acremonium chrysogenum*. *Curr. Genet.*, **47**, 132-138.
7. Spröte, P. and Brakhage, A.A. (2007) The light-dependent regulator velvet A of *Aspergillus nidulans* acts as a repressor of the penicillin biosynthesis. *Arch. Microbiol.*, **188**, 69-79.
8. Sato, I., Shimizu, M., Hoshino, T. and Takaya, N. (2009) The glutathione system of *Aspergillus nidulans* involves a fungus-specific glutathione S-transferase. *J. Biol. Chem.*, **284**, 8042-8053.
